# Supplementary material
Source: Springer Nature journal article supplement (https://www.springermedizin.de/resource/supplementary/13256_2010_1600_MOESM2_ESM.pdf/9648028)

Time: ms

Slice: 2 mm

Pos: -496

HFS

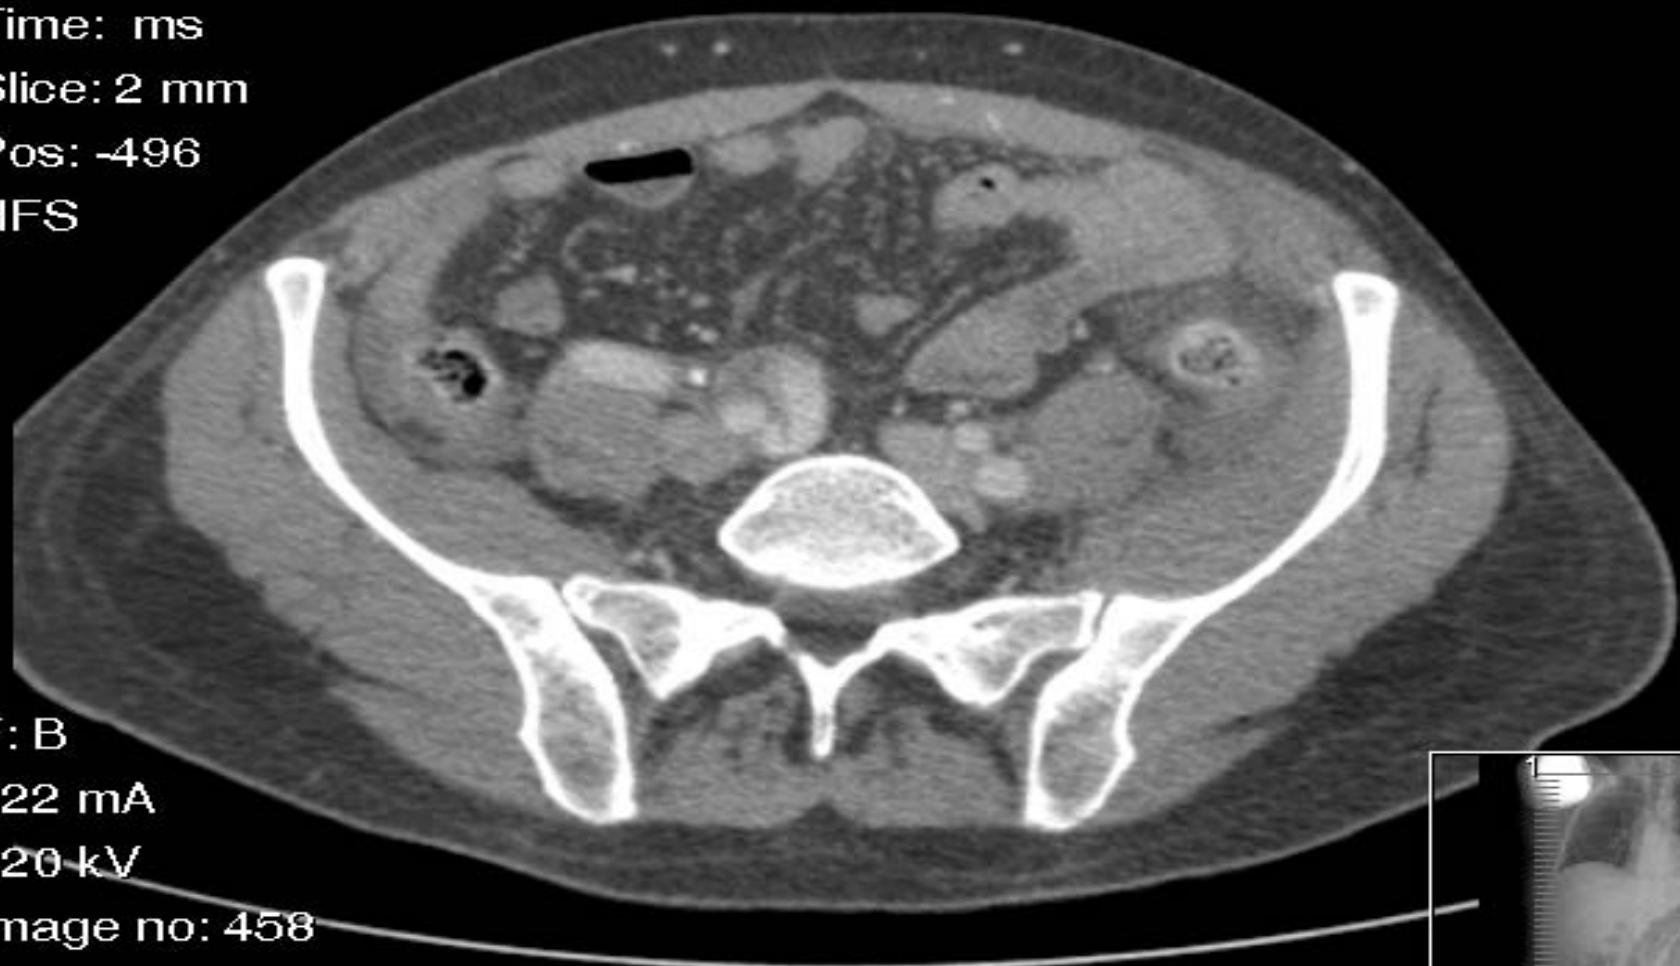

F: B

222 mA

120 kV

Image no: 458

Image 458 of 605

P

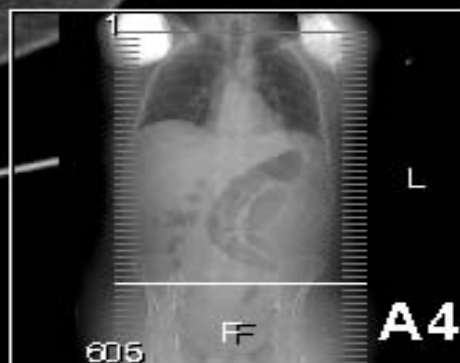

605

FF

A4

Supplement: MOESM2 [file 9648028]
